# Supplementary material for: A phase I study of multi-HLA-binding peptides derived from heat shock protein 70/glypican-3 and a novel combination adjuvant of hLAG-3Ig and Poly-ICLC for patients with metastatic gastrointestinal cancers: YNP01 trial
Source: Springer Nature journal article supplement (doi:10.1007/s00262-020-02518-7), 2020-03-26
Supplement: MOESM1 [file 17834786]

## Supplementary table

**Table S1. Candidate epitope peptides derived from GPC3**

| peptide      | Position   | Amino acid<br>sequence | Affinities of each peptide for the HLAs |              |                |
|--------------|------------|------------------------|-----------------------------------------|--------------|----------------|
|              |            |                        | A*24:02                                 | A*02:01      | A*02:06        |
|              |            |                        | log Kd                                  | log Kd       | log Kd         |
| <b>GPC-1</b> | <b>166</b> | <b>MVNELFDSL</b>       | <b>-4.69</b>                            | <b>-5.3</b>  | <b>-6.14</b>   |
| <b>GPC-2</b> | <b>170</b> | <b>LFDSLFPVI</b>       | <b>-7.42</b>                            | <b>-5.07</b> | <b>&gt; -3</b> |
| GPC-3        | 190        | SALDINECL              | > -3                                    | > -3         | -6.32          |
| <b>GPC-4</b> | <b>222</b> | <b>SLQVTRIFL</b>       | <b>-5.34</b>                            | <b>-6.21</b> | <b>-5.21</b>   |
| GPC-5        | 407        | GYICSHSPV              | -6.55                                   | > -3         | > -3           |
| GPC-6        | 232        | ALNLGIEVI              | -3.96                                   | -5.92        | -4.16          |
| GPC-7        | 512        | GMIKVKNQL              | -6.9                                    | -4.76        | -3.36          |
| GPC-8        | 85         | ARLNMEQLL              | -5.2                                    | -3.84        | -2.76          |

**Table S2. Antigen-peptide reactive immune response**

| Level   | Patient Number | HLA allele | Result of ELISPOT Assay (HSP70/GPC3) |          |          |          |
|---------|----------------|------------|--------------------------------------|----------|----------|----------|
|         |                |            | Pre-treatment                        | 1 course | 2 course | 3 course |
| Level 1 | 1-1            | 24:02      | - / 1+                               | NE       | - / 2+   | 2+ / 2+  |
|         | 1-2            | 24:02      | 1+ / 4+                              | 2+ / 3+  | 4+ / 1+  |          |
|         | 1-3            | 24:02      | 1+ / -                               | 1+ / 1+  |          |          |
| Level 2 | 2-1            | 02:06      | NE                                   | 1+ / 1+  | 3+ / 3+  | NE       |
|         | 2-2            | 02:01      | 3+ / 5+                              | 3+ / 1+  | - / -    | 3+ / 2+  |
|         | 2-3            | 24:02      | 1+ / 1+                              | 1+ / 2+  | 1+ / 1+  | 1+ / 1+  |
| Level 3 | 3-1            | 24:02      | 3+ / -                               | 5+ / 4+  | 3+ / -   | - / 1+   |
|         | 3-2            | 02:06      | 1+ / 4+                              | 3+ / -   | 1+ / 3+  | 1+ / -   |
|         |                | 24:02      | - / -                                | 1+ / -   | - / -    | 2+ / 1+  |
|         | 3-3            | 02:01      | 3+ / 3+                              | 3+ / 4+  | 1+ / 1+  |          |
|         | 3-4            | 24:02      | 1+ / 1+                              | 3+ / 1+  | 3+ / 3+  |          |
|         | 3-5            | 02:01      | 1+ / 1+                              | 1+ / 4+  | 4+ / 1+  |          |
|         | 3-6            | 24:02      | 1+ / 1+                              | 2+ / 5+  | 5+ / 4+  | 1+ / 1+  |
|         | 3-7            | 02:06      | 2+ / 4+                              | 3+ / 3+  | 1+ / -   |          |
|         |                | 24:02      | 3+ / 4+                              | 4+ / 4+  | 2+ / -   |          |
|         | 3-8            | 02:01      | 1+ / 1+                              | - / 1+   |          |          |
|         | 3-9            | 02:06      | 1+ / -                               | 4+ / 1+  | 4+ / 1+  |          |
| 24:02   |                | 1+ / -     | 5+ / 2+                              | 4+ / -   |          |          |
| 3-10    | 02:06          | 4+ / 1+    | - / 1+                               | 3+ / 4+  |          |          |
|         | 02:01          | 3+ / -     | 1+ / 4+                              | 3+ / 3+  |          |          |
| 3-11    | 24:02          | 1+ / 1+    | 3+ / 2+                              | - / -    |          |          |

ND: Not done, NE: Not evaluate

**Table S3. All adverse events by maximum grade per patient**

| Adverse event                         | Treatment Level (No. of patients)      |      |                   |      |                     |      |
|---------------------------------------|----------------------------------------|------|-------------------|------|---------------------|------|
|                                       | Level 1 (n=3)                          |      | Level 2 (n=3)     |      | Level 3 (n=11)      |      |
|                                       | Grading of Adverse Events (CTCAE v4.0) |      |                   |      |                     |      |
|                                       | G1/2                                   | G3/4 | G1/2              | G3/4 | G1/2                | G3/4 |
| Anemia                                | 1                                      |      | 1                 |      | 1                   |      |
| Appendicitis                          |                                        |      |                   | 1    |                     |      |
| Appetite loss                         |                                        |      |                   | 2    |                     |      |
| Ascites                               |                                        | 1    |                   |      |                     |      |
| Aspiration                            |                                        |      |                   | 1    |                     |      |
| Back pain                             |                                        |      |                   |      | 1                   |      |
| Bronchial stricture<br>and hemorrhage |                                        |      |                   | 1    |                     |      |
| Dysphagia                             |                                        |      |                   |      |                     | 1    |
| Dyspnea                               |                                        |      |                   | 1    |                     |      |
| Edema                                 | (1 <sup>a</sup> )                      |      |                   |      | (1 <sup>a</sup> )   |      |
| Fever                                 | 1                                      |      |                   |      |                     |      |
| Gastrointestinal hemorrhage           |                                        | 1    |                   |      |                     |      |
| Hypercalcemia                         |                                        | 1    |                   |      |                     |      |
| Hypertension                          |                                        |      |                   |      |                     | 1    |
| Hypoalbuminemia                       | 1                                      |      | 1                 |      |                     |      |
| Hypokalemia                           |                                        | 1    |                   |      |                     |      |
| Hyponatremia                          |                                        | 1    |                   |      |                     |      |
| Ileus                                 |                                        | 1    |                   |      |                     | 1    |
| Increased AST or ALT                  |                                        |      |                   |      | 1                   | 1    |
| Injection site reaction               | (1 <sup>c</sup> )                      |      | (1 <sup>c</sup> ) |      | (3 <sup>b,c</sup> ) |      |
| Intra-IVC tumor thrombus              |                                        | 1    |                   |      |                     |      |
| Nausea or vomiting                    |                                        | 1    | 1                 |      |                     |      |
| Upper respiratory infection           |                                        |      |                   | 1    |                     |      |
| Tumor pain                            | 1                                      |      | 1                 |      |                     |      |

All adverse events, in parenthesis (\*): related adverse events (a:possible, b:probable, c:definite), AST : Aspartate aminotransferase, ALT: Alanine aminotransferase
