# Supplementary material for: A phase I study of multi-HLA-binding peptides derived from heat shock protein 70/glypican-3 and a novel combination adjuvant of hLAG-3Ig and Poly-ICLC for patients with metastatic gastrointestinal cancers: YNP01 trial
Source: Springer Nature journal article supplement (doi:10.1007/s00262-020-02518-7), 2020-03-26
Supplement: MOESM3 [file 17834786]

1 **Supplementary Figure**

**A**

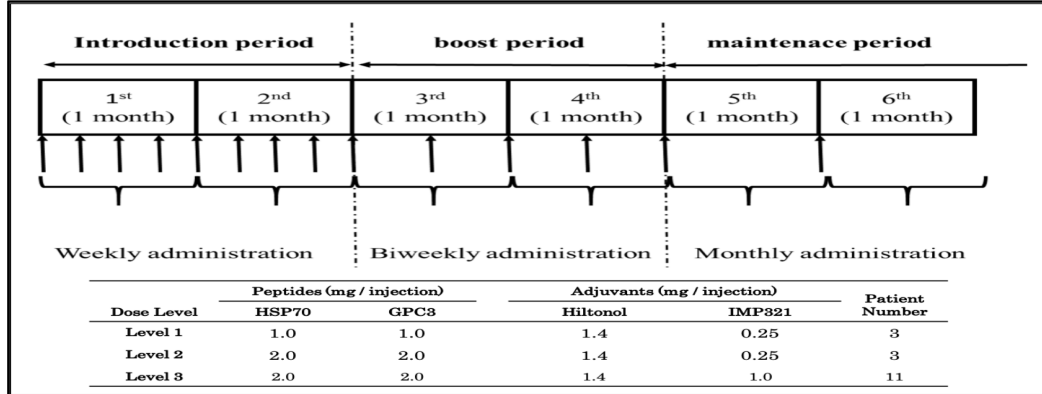

**B**

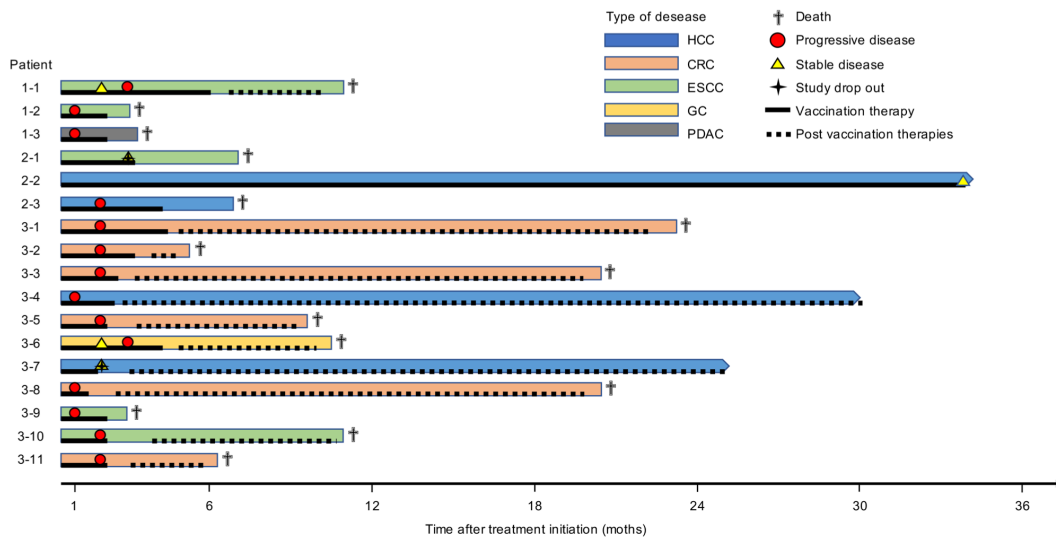

2

3 **Fig. S1. Study design and clinical outcomes of enrolled patients.**

4 A, Treatment schedule, dose escalation and cohort assignment of this study. B, Swimmer plot

5 for enrolled patients (n = 17).

6

7

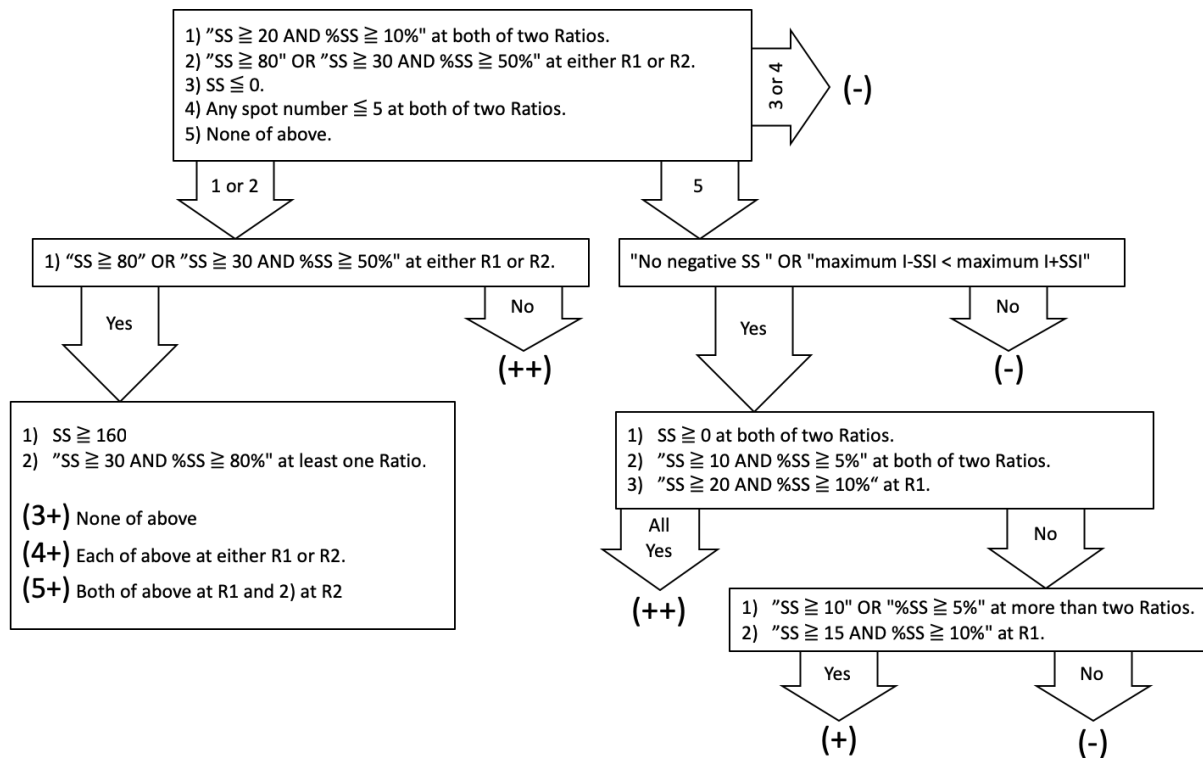

8

9 **Fig. S2. ELISPOT assay protocol used in this study.**

10 Positivity of antigen-specific T cell response was quantitatively defined according a tree  
 11 algorithm. In brief, the peptide-specific spots (SS) were the averages of triplicates and were  
 12 determined by subtracting the value of the HIV peptide-pulsed stimulator well from that of  
 13 the immunized peptide-pulsed stimulator well. %SS is the percentage of SS among the  
 14 average number of spots in the immunized peptide pulsed stimulator well. Positivity of  
 15 antigen-specific T cell response was classified as  $-$ ,  $+$ ,  $2+$ ,  $3+$ ,  $4+$ , or  $5+$  depending on the  
 16 numbers of peptide-specific spots and the invariability of the peptide-specific spots at  
 17 different responder/stimulator ratios. SS, peptide-specific spots; R1, responder/stimulator  
 18 ratio = 1; R2, responder/stimulator ratio = 0.5.

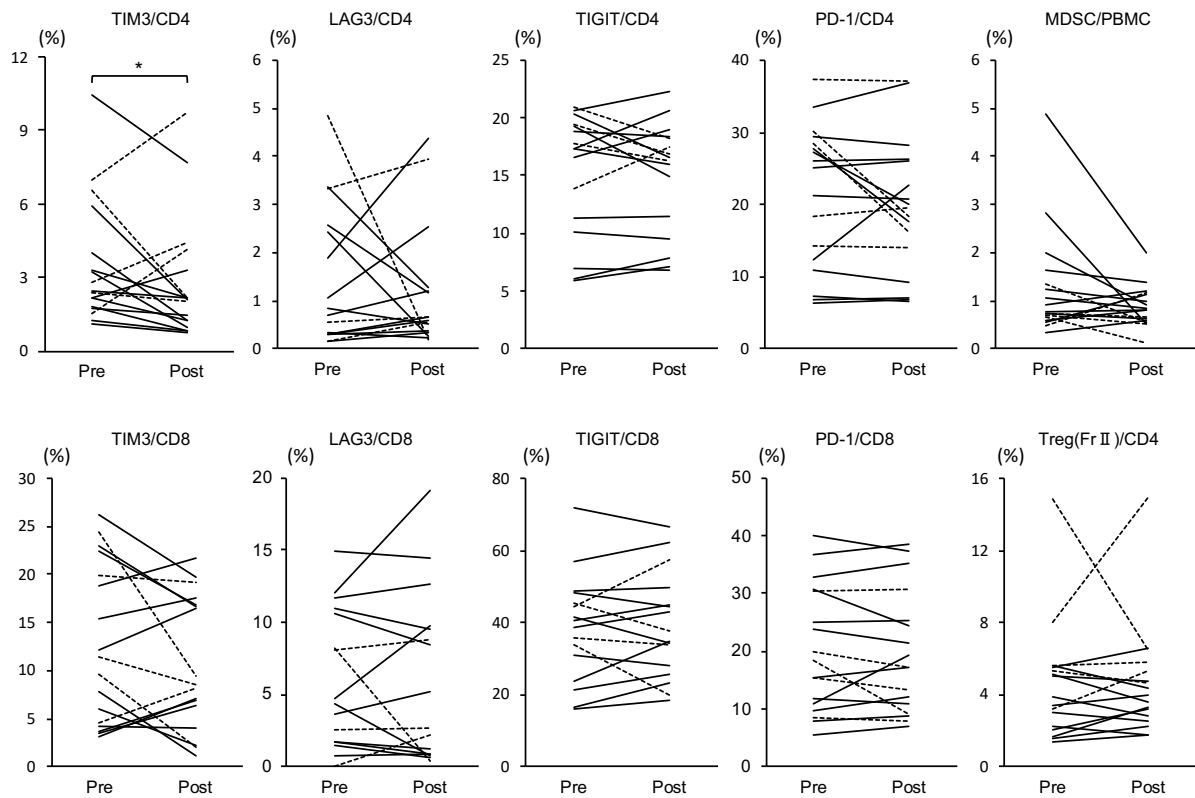

20

21 **Fig. S3. Flow cytometric analysis of surface marker expression on PBMCs before and**

22 **after treatment**

23 Comparison of the exhaustion marker expression levels in CD4 and CD8 T and

24 immunosuppressive (Treg and MDSC) cells in the PBMCs before and after one course of

25 treatment. (\*,  $P < 0.05$ )
